# Supplementary material
Source: PubMed Central journal article supplement (PMC6766979)
Supplement: ANDR-7-644-s001.pdf [file ANDR-7-644-s001.pdf]

# Supplemental Fig. S1 (Noda et al.)

|               |     |                                                                  |     |
|---------------|-----|------------------------------------------------------------------|-----|
| mGM1110/1-635 | 1   | --MVAFLGRPE-----CILCLSSAL--CAMA                                  | 22  |
| mGLB1L2/1-676 | 1   | MPKWSLRRRPGRTLGLLLLLLVLSFLVLRSPRVFMLNVVSVLFLAAASACSSPAVGPSPGS    | 60  |
| mGLB1L3/1-649 | 1   | -----MAIFFLPTV-----LSGFAPHS                                      | 17  |
| mGM1110/1-635 | 23  | LLSNNEFSRLNQTHLTPLLLINRKVGLQVKD-----SQFTLEGFPFRISGTIDYFRIPR      | 77  |
| mGLB1L2/1-676 | 61  | SAEESHLSRLNMSTLVPLWLQHQRGLRRTKG-----PDFILEDSEIFQILGGSIHFRVPR     | 115 |
| mGLB1L3/1-649 | 18  | EEVFKSPARFWSNLTPESELKNRFVGLSTKTNALGKAYFTLEGHKFMI VGGSIHYFRVPR    | 77  |
| mGM1110/1-635 | 78  | NSWRLSLRKMQAGGFNTLTTHIPWNLHEPAVGQFYFTENTDLIAFITMASQSGLWVILCP     | 137 |
| mGLB1L2/1-676 | 116 | EYWRDRLLKLLKACGLNLTITYVPWNLHEPERGKFDSEGNLDLEAFIQLAAKIGLWVILRP    | 175 |
| mGLB1L3/1-649 | 78  | EYWKDRLLKLLQACGFNTVTTYIPWNLHEQERGKFDSEILDLEAYVLLAKTIGLWVILRP     | 137 |
| mGM1110/1-635 | 138 | GPYIGSDL DLGGLPSWLLKDPKMKLRTTYKGFTKAMNRYFDNLI PKIAKFQYKKGPP IIA  | 197 |
| mGLB1L2/1-676 | 176 | GPYICSEIDLGGLPSWLLQDPDMKLRRTTYHGFTKAVDLYFDHLMRSRVVPLQYKHGGP IIA  | 235 |
| mGLB1L3/1-649 | 138 | GPYICAEVDLGGLPSWLLRNPVTDLRRTTKGFI EAVDKYFDHLIPKILPLQYRHGGPVIA    | 197 |
| mGM1110/1-635 | 198 | VQVENEYGSY YMDKKYMAVVKTALVSRGIDELLMTADDGVS LRKGHLENVLATVHMKNIK   | 257 |
| mGLB1L2/1-676 | 236 | VQVENEYGSYNKDRAYMPYIKKALEDRG IIEMLLTS DNKDGLEKGVVDGVLATINLQSQQ   | 295 |
| mGLB1L3/1-649 | 198 | VQVENEYGSFQKDRNYMNYLKKALLKRG IVELLLTSDDKDG IQIGSVNGALTTINMNSFT   | 257 |
| mGM1110/1-635 | 258 | KETF--GD LRSIQGKSPILMMVYTTKSFDTWGTLHQGTDAQMLLKDVHEMFHLGFSLNIFY   | 315 |
| mGLB1L2/1-676 | 296 | ELMALNTVLLS IQG IQPKMVMYWTGWFDSWGSHNILDSS EVLQTVSAITKDGSSINLY    | 355 |
| mGLB1L3/1-649 | 258 | KDSF--IKLHKMQSDKPI MIMYWTGWYDSWGSKHIEKSAEEIRHTVYKFI SYGLSFNMY    | 315 |
| mGM1110/1-635 | 316 | MFQGGTNFGL I GGAQSSEGYKPVVTSYDYNALVSEGG EYTVQYREFQRF FHSVTDSHLTV | 375 |
| mGLB1L2/1-676 | 356 | MFHGGTNFGF IN GAMHFNDYKADVTSYDYDA ILTEAGDYTAKYTKLRELFGTVSGIPPPP  | 415 |
| mGLB1L3/1-649 | 316 | MFHGGTNFGF INGGRYENHHISVVTSYDYDAVLSEAGDYTEKYFKLRKLFASGSARPLPP    | 375 |
| mGM1110/1-635 | 376 | QPKTTQMFAYQPVTLLYFMTLWFLPNLVKTTKSSKPLSMEQLRVNERSGQSFYIILYET      | 435 |
| mGLB1L2/1-676 | 416 | PPELTAKMVYEPMSPALYLSLWDAIQYMDKPV TSETPINMENLPVNNNGQA FGYVL YET   | 475 |
| mGLB1L3/1-649 | 376 | LPPLIPKAIYPSVNLSFYLP LFDILPYLNQPVMLHTPV TMENLPINNGSGQPFGLVLYET   | 435 |
| mGM1110/1-635 | 436 | VIFSSGGLITSRGHIRDRGQVFLDN IYIGLLDQSNSE LLLYKDVSKKSQILRILVENQGR   | 495 |
| mGLB1L2/1-676 | 476 | TIFSSGVLS--GLVRDRGQVFLNRVSI GFLDYKTTKITI--PLTQGYTILRILVENRGRV    | 531 |
| mGLB1L3/1-649 | 436 | SICSGGSLF--ASVHDSAQVFLNDQSIGIL DENHEVLQI--PKIQGCQLLRILVENQGR     | 491 |
| mGM1110/1-635 | 496 | TSGQDINKERKGLTGD IYLDKSPLRPFKIYSLEMN NIFIQREFPNSWQRVTSQVQGP AFF  | 555 |
| mGLB1L2/1-676 | 532 | NYGNNIDSQRKGLIGNLYLNKALKNFKIYSLDMTKQFLQRFDMDNVSVIPKELTFP AFF     | 591 |
| mGLB1L3/1-649 | 492 | NYSWRIQSEQKGLKEVVSIDGLLLTNFTIYSLDMKMSFFKRLRSASWRLAPKTYNGPAFY     | 551 |
| mGM1110/1-635 | 556 | LSYLKAGDPPQDTFMKI QGAGKGVIS INGRSLGRYWNIGPQETVFVPGSWLQPGVNK IIM  | 615 |
| mGLB1L2/1-676 | 592 | LGALSVG IYPSDTFLKLEGVWKGVVFNHNLGRYWNVGPQETLYLPGWLDKGINKVI I      | 651 |
| mGLB1L3/1-649 | 552 | AGILNAGSSPTDTFLHLPNWHYGFVFINGRNLGRYWDIGPQRTLYLPGPWLHPEDNEVIV     | 611 |
| mGM1110/1-635 | 616 | FEEKKGDEK IHFSTKAQLGH-----                                       | 635 |
| mGLB1L2/1-676 | 652 | FEE TMSGSMVQSTDIPHLGRNQYIN-----                                  | 676 |
| mGLB1L3/1-649 | 612 | FEKIEKGFDIQTRKKPQLQECYETGSGLPDAAGDADPC                           | 649 |
